# Supplementary material for: Analysis of METTL3 and METTL14 in hepatocellular carcinoma
Source: publisher site journal article supplement (doi:10.18632/aging.103959), 2020-11-06
Supplement: Supplementary file [file aging-v12i21-103959-supplementary-material-SD3.pdf]

## SUPPLEMENTARY TABLES

**Supplementary Table 3. The correlations between the expression of hub genes and METTL3 expression in HCC.**

| Gene   | R     | P value | Gene     | R    | P value |
|--------|-------|---------|----------|------|---------|
| ZWINT  | 0.51  | <0.001  | CLSPN    | 0.5  | <0.001  |
| MYLIP  | 0.32  | <0.001  | TIMELESS | 0.56 | <0.001  |
| FANCI  | 0.43  | <0.001  | MLEC     | 0.49 | <0.001  |
| EXO1   | 0.51  | <0.001  | DTL      | 0.47 | <0.001  |
| HGSNAT | 0.31  | <0.001  | CBLB     | 0.43 | <0.001  |
| BTBD1  | 0.33  | <0.001  | SPSB2    | 0.39 | <0.001  |
| KNTC1  | 0.59  | <0.001  | PLAUR    | 0.25 | <0.001  |
| DET1   | 0.42  | <0.001  | MELK     | 0.53 | <0.001  |
| FBXO2  | -0.1  | 0.05    | KBTBD6   | 0.45 | <0.001  |
| SLC2A3 | 0.11  | 0.039   | ASPM     | 0.51 | <0.001  |
| KCNAB2 | 0.024 | 0.65    | KLHL22   | 0.45 | <0.001  |
| FBXW4  | 0.36  | <0.001  | ALDH3B1  | 0.23 | <0.001  |
| HERC6  | 0.078 | 0.13    | TSPAN14  | 0.43 | <0.001  |
| STOM   | 0.019 | 0.17    | ASF1B    | 0.4  | <0.001  |
| UBOX5  | 0.48  | <0.001  | BRCA1    | 0.46 | <0.001  |

**Supplementary Table 4. The associations between the expression of hub genes and overall survival of HCC patients.**

| Gene   | HR (95%CI)        | P value | Gene     | HR (95%CI)       | P value |
|--------|-------------------|---------|----------|------------------|---------|
| ZWINT  | 2.36 (1.66-3.36)  | <0.001  | CLSPN    | 2.26 (1.6-3.19)  | <0.001  |
| MYLIP  | 1.41 (0.99-2.01)  | 0.059   | TIMELESS | 1.63 (1.15-2.3)  | 0.0053  |
| FANCI  | 2.11 (1.43-3.13)  | <0.001  | MLEC     | 1.31 (0.89-1.92) | 0.17    |
| EXO1   | 2.3 (1.63-3.26)   | <0.001  | DTL      | 1.89 (1.33-2.69) | <0.001  |
| HGSNAT | 0.67 (0.47-0.96)  | 0.029   | CBLB     | 1.2 (0.85-1.69)  | 0.3     |
| BTBD1  | 0.69 (0.46-1.03)  | 0.07    | SPSB2    | 1.71 (1.2-2.43)  | 0.0026  |
| KNTC1  | 1.96 (1.36-2.81)  | <0.001  | PLAUR    | 1.99 (1.25-3.18) | 0.0032  |
| DET1   | 0.65 (0.45-0.93)  | 0.018   | MELK     | 2.22 (1.5-3.27)  | <0.001  |
| FBXO2  | 0.62 (0.044-0.89) | 0.0081  | KBTBD6   | 0.58 (0.41-0.83) | 0.0021  |
| SLC2A3 | 0.8 (0.54-1.18)   | 0.25    | ASPM     | 2.01 (1.39-2.92) | <0.001  |
| KCNAB2 | 1.32 (0.88-1.97)  | 0.17    | KLHL22   | 0.86 (0.6-1.22)  | 0.4     |
| FBXW4  | 0.62 (0.44-0.88)  | 0.0067  | ALDH3B1  | 1.53 (1.08-2.18) | 0.017   |
| HERC6  | 0.69 (0.48-0.99)  | 0.044   | TSPAN14  | 0.69 (0.48-1)    | 0.047   |
| STOM   | 0.52 (0.35-0.78)  | 0.0015  | ASF1B    | 1.71 (1.21-2.42) | 0.002   |
| UBOX5  | 0.73 (0.52-1.05)  | 0.077   | BRCA1    | 1.82 (1.26-2.61) | 0.0011  |

**Supplementary Table 5. The correlations between the expression of hub genes and METTL14 expression in HCC.**

| Gene   | R      | P value | Gene    | R      | P value |
|--------|--------|---------|---------|--------|---------|
| FBXO2  | 0.032  | 0.54    | WDR43   | 0.51   | <0.001  |
| FBXW2  | 0.58   | <0.001  | SPSB1   | 0.24   | <0.001  |
| ASB13  | -0.1   | 0.055   | RRP1B   | 0.52   | <0.001  |
| FBXL15 | -0.016 | 0.75    | NOP56   | -0.077 | 0.14    |
| VPRBP  | 0.73   | <0.001  | FBXO10  | 0.26   | <0.001  |
| NOL10  | 0.44   | <0.001  | ANKRD9  | 0.22   | <0.001  |
| NOM1   | 0.48   | <0.001  | BMP4    | 0.18   | <0.001  |
| POLR3B | 0.55   | <0.001  | UTP3    | 0.56   | <0.001  |
| LGALS1 | -0.099 | 0.058   | IGFBP1  | 0.084  | 0.11    |
| WDR75  | 0.32   | <0.001  | STC2    | 0.093  | 0.075   |
| UTP15  | 0.59   | <0.001  | CALU    | 0.34   | <0.001  |
| RNF4   | 0.53   | <0.001  | PAK1IP1 | 0.35   | <0.001  |
| FBXW5  | 0.26   | <0.001  | RSL1D1  | 0.46   | <0.001  |
| RBM19  | 0.22   | <0.001  | WFS1    | 0.12   | 0.023   |
| SIAH2  | 0.26   | <0.001  | LAMC1   | 0.38   | <0.001  |

**Supplementary Table 6. The associations between the expression of hub genes and overall survival of HCC patients.**

| Gene   | HR (95%CI)       | P value | Gene    | HR (95%CI)       | P value |
|--------|------------------|---------|---------|------------------|---------|
| FBXO2  | 0.62 (0.44-0.89) | 0.0081  | WDR43   | 1.64 (1.15-2.33) | 0.0055  |
| FBXW2  | 0.7 (0.49-0.99)  | 0.045   | SPSB1   | 0.78 (0.55-1.1)  | 0.16    |
| ASB13  | 0.79 (0.55-1.16) | 0.23    | RRP1B   | 0.81 (0.54-1.22) | 0.31    |
| FBXL15 | 0.61 (0.42-0.89) | 0.0091  | NOP56   | 2.33 (1.65-3.3)  | <0.001  |
| VPRBP  | 0.78 (0.56-1.11) | 0.17    | FBXO10  | 1.46 (1.01-2.12) | 0.041   |
| NOL10  | 1.88 (1.32-2.68) | <0.001  | ANKRD9  | 0.65 (0.46-0.93) | 0.017   |
| NOM1   | 0.79 (0.55-1.11) | 0.17    | BMP4    | 1.38 (0.96-1.99) | 0.082   |
| POLR3B | 0.78 (0.54-1.12) | 0.18    | UTP3    | 0.8 (0.57-1.14)  | 0.22    |
| LGALS1 | 1.56 (1.08-2.25) | 0.018   | IGFBP1  | 0.73 (0.51-1.03) | 0.072   |
| WDR75  | 2.09 (1.45-3.02) | <0.001  | STC2    | 1.95 (1.38-2.75) | <0.001  |
| UTP15  | 1.18 (0.8-1.74)  | 0.4     | CALU    | 1.85 (1.28-2.68) | <0.001  |
| RNF4   | 1.31 (0.92-1.87) | 0.13    | PAK1IP1 | 1.98 (1.35-2.91) | <0.001  |
| FBXW5  | 0.88 (0.62-1.25) | 0.47    | RSL1D1  | 1.33 (0.94-1.88) | 0.1     |
| RBM19  | 2.03 (1.42-2.89) | <0.001  | WFS1    | 1.45 (0.95-2.2)  | 0.081   |
| SIAH2  | 0.54 (0.38-0.78) | <0.001  | LAMC1   | 1.43 (0.98-2.09) | 0.062   |
